# Supplementary material for: Orthogonal canalized polaritons via coupling graphene plasmon and phonon polaritons of hBN metasurface
Source: publisher site journal article supplement (doi:10.1515/nanoph-2025-0385), 2025-11-03
Supplement: Supplementary file [file j_nanoph-2025-0385_suppl_001.pdf]

# Supplementary Material for “Orthogonal canalized polaritons via coupling graphene plasmon and phonon polaritons of hBN grating”

## Supplementary Note 1: Permittivity of hBN and surface conductivity of graphene

The frequency-dependent permittivity  $\varepsilon(\omega)$  of the hBN slab is modeled using the Lorentz oscillator model [43]:

$$\varepsilon_k(\omega) = \varepsilon_{\infty,k} \left( 1 + \frac{\omega_{LO,k}^2 - \omega_{TO,k}^2}{\omega_{TO,k}^2 - \omega^2 - i\omega\gamma_k} \right), k = \perp \text{ or } \parallel \quad (\text{S1})$$

where  $\varepsilon(\omega)_{\parallel}$  and  $\varepsilon(\omega)_{\perp}$  represent the out-of-plane and in-plane permittivities of hBN, respectively. The transverse optical (TO) and longitudinal optical (LO) phonon frequencies are given by  $\omega_{TO,k}$  ( $\omega_{TO,\parallel} = 785 \text{ cm}^{-1}$ ,  $\omega_{TO,\perp} = 1395 \text{ cm}^{-1}$ ) and  $\omega_{LO,k}$  ( $\omega_{LO,\parallel} = 845 \text{ cm}^{-1}$ ,  $\omega_{LO,\perp} = 1630 \text{ cm}^{-1}$ ) in the  $k$  direction, respectively. The damping constant is  $\gamma_k$  ( $\gamma_{\parallel} = 1 \text{ cm}^{-1}$ ,  $\gamma_{\perp} = 2 \text{ cm}^{-1}$ ), and the high-frequency permittivity values are  $\varepsilon_{\infty,k}$  ( $\varepsilon_{\infty,\parallel} = 2.8$ ,  $\varepsilon_{\infty,\perp} = 3$ ). Based on Eqs. (1) to (3), the effective permittivity components of the hBN metasurface are plotted in Figure S1. In particular,  $\varepsilon_{eq,y}$  (MEMT) is derived from the modified effective medium theory (MEMT) [38, 39] captures the strong near-field coupling between the hBN ribbons, while  $\varepsilon_{eq,y}$  (MGA) based on the Maxwell-Garnett approximation (MGA) [43, 49] reflects the case of weak coupling.

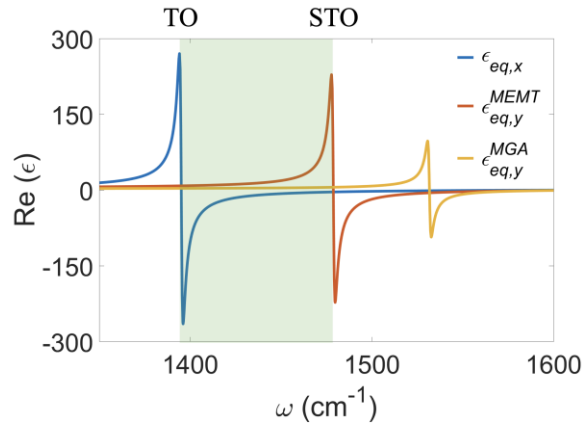

**Figure S1. Effective permittivity of hBN ribbon metasurfaces.** Real parts of equivalent permittivity components calculated by Eq. (1)–(3) using MEMT for a grating composed of hBN ribbons with parameters: period  $P = 100 \text{ nm}$ , ribbon gap  $g = 30 \text{ nm}$ , ribbon width  $w = 70 \text{ nm}$ , and height  $h = 20 \text{ nm}$ .

In this work, graphene is modeled as an infinitesimally thin conductive sheet, with its surface conductivity  $\sigma$  described by the Kubo formula [13, 32, 34, 41]:

$$\sigma = \frac{-ie^2 k_B T}{\pi \hbar^2 (\omega - i/\tau)} \left( \frac{E_f}{k_B T} + 2 \ln(e^{-E_f/k_B T} + 1) \right) - \frac{ie^2}{4\hbar} \ln \left( \frac{2E_f - \hbar(\omega - i/\tau)}{2E_f + \hbar(\omega - i/\tau)} \right). \quad (\text{S2})$$

Here,  $\omega$  is the angular frequency,  $E_f$  the Fermi energy,  $\tau = \mu E_f / e v_f^2$  the carrier relaxation lifetime,  $T$  the absolute temperature,  $e$  the electron charge,  $k_B$  the Boltzmann constant,  $\hbar$  the reduced Plank constant,  $\mu$  the carrier mobility in graphene, and  $v_f = 10^6$  m/s the Fermi velocity of electrons. The first and second terms in Eq. (S2) correspond to the intra-band and inter-band contributions to conductivity, respectively. The optical response of graphene can be dynamically tuned by modifying the Fermi energy  $E_f$  through electrostatic gating or chemical doping. In our simulations, we used a realistic carrier mobility of  $\mu = 0.6$  m<sup>2</sup>/V·s and  $T = 300$  K. For analytical modeling in §2, the surface conductivity  $\sigma$  is translated into an effective anisotropic permittivity using  $\epsilon_{gp} = 2.5 + i \sigma / (\omega \epsilon_0 h_g)$  and  $\epsilon_{gz} = 2.5$ , where  $\epsilon_{gp}$  and  $\epsilon_{gz}$  represent the in-plane and out-of-plane components of graphene's permittivity, respectively,  $\epsilon_0$  is the vacuum permittivity, and  $h_g = 0.34$  nm is the nominal thickness of monolayer graphene.

## Supplementary Note 2: Analytical dispersion relation of the proposed structure using a five-layer waveguide model [47]

To derive the analytical dispersion relation, the proposed graphene-covered hBN metasurface is modeled as a five-layer slab waveguide (see Fig. S2). From top to bottom, the five layers are defined as follows: air ( $z > 0$ ), top graphene layer ( $-d_1 < z < 0$ ), hBN ribbon grating ( $-d_2 < z < -d_1$ ), bottom graphene layer ( $-d_3 < z < -d_2$ ), and SiO<sub>2</sub> substrate ( $z < -d_3$ ). The isotropic permittivities of the air and substrate are denoted as  $\epsilon_a$  and  $\epsilon_s$ , respectively. The graphene layers and the hBN metasurface are treated as anisotropic media, characterized by permittivity tensors:  $\bar{\epsilon} = \text{diag}\{\epsilon_{gp}, \epsilon_{gp}, \epsilon_{gz}\}$  and  $\text{diag}\{\epsilon_{eq,x}, \epsilon_{eq,y}, \epsilon_{eq,z}\}$ , respectively. We consider polaritons propagating in the  $xy$ -plane with an in-plane wave vector  $\vec{k} = (k_x, k_y)$  at an angle  $\theta$  with respect to the  $x$ -axis. Under this coordinate rotation (counterclockwise about the  $z$ -axis), the effective in-plane ( $\epsilon_{\perp}$ ) and out-of-plane ( $\epsilon_{\parallel}$ ) permittivity components of the hBN metasurface are expressed as:  $\epsilon_{\perp} = \epsilon_{eq,x} \cos^2\theta + \epsilon_{eq,y} \sin^2\theta$  and  $\epsilon_{\parallel} = \epsilon_{eq,z}$ .

This model focuses on the derivation of the transverse magnetic (TM) mode,<sup>34</sup> where the magnetic field vector can be written as:  $\vec{H} = H_y(z)e^{(ipx - \omega t)}\hat{e}_y$  with  $\hat{e}_y$  denoting the unit vector along the  $y$ -axis, and  $p$  being the propagation constant to be determined. By applying this form to the three-dimensional wave equation and considering boundary conditions across each interface, the wave equations are simplified for each layer, leading to the analytical dispersion relation of the system:

$$\frac{\partial^2 \vec{H}_y}{\partial z^2} + (k_0^2 \epsilon_{a,s} - p^2) \vec{H}_y = 0, \quad (\text{S3})$$

$$\frac{\partial^2 \vec{H}_y}{\partial z^2} + (k_0^2 \epsilon_t^{(j)} - \frac{\epsilon_z^{(j)}}{\epsilon_z^{(j)}} p^2) \vec{H}_y = 0, \quad (\text{S4})$$

where the subscript  $j = 2, 3$ , and  $4$  in Eq. (S4) refers to the layers 2 (top graphene), 3 (hBN ribbon grating), and 4 (bottom graphene), respectively. The terms  $\epsilon_t^{(j)}$  and  $\epsilon_z^{(j)}$  represent the in-plane and out-of-plane permittivity components of layer  $j$ . For convenience, we define the following relations:  $\epsilon_t^{(3)} = \epsilon_{\perp}$ ,  $\epsilon_z^{(3)} = \epsilon_{\parallel}$ ,  $\epsilon_t^{(2)} = \epsilon_t^{(4)} = \epsilon_{gp}$ , and  $\epsilon_z^{(2)} = \epsilon_z^{(4)} = \epsilon_{gz}$ . Considering the field behavior within each layer, the magnetic field component  $H_y(z)$  is assumed to take the following form:

$$H_y(z) = \begin{cases} (A+B)e^{-\kappa_a z}, & (z > 0) \\ A e^{ik_z^{(2)} z} + B e^{-ik_z^{(2)} z}, & (-d_1 < z \leq 0) \\ C e^{ik_z^{(3)} z} + D e^{-ik_z^{(3)} z}, & (-d_2 < z \leq -d_1) \\ E e^{ik_z^{(4)} z} + F e^{-ik_z^{(4)} z}, & (-d_3 < z \leq -d_2) \\ (E e^{-ik_z^{(4)} d_3} + F e^{ik_z^{(4)} d_3}) e^{\kappa_s(z+d_3)}, & (z \leq -d_3) \end{cases} \quad (\text{S5})$$

where  $\kappa_{a,s} = \sqrt{p^2 - k_0^2 \varepsilon_{a,s}}$  is the transverse wave vector in air layer 1 ( $\kappa_a$ ) or substrate layer ( $\kappa_s$ ), and  $k_z^{(j)} = \sqrt{k_0^2 \varepsilon_t^{(j)} - (\varepsilon_t^{(j)} / \varepsilon_z^{(j)}) p^2}$  is the  $z$ -component of wave vector of the layer  $j$ . The  $A, B, C, D, E$ , and  $F$  are coefficients determined by boundary conditions at the interfaces. Next, the  $x$ -component of electric field  $\vec{E} = E_x(z) e^{(ipx - \omega t)} \hat{e}_x$ , where  $\hat{e}_x$  is the unit vector in the  $x$ -direction, can be found by the curl equation  $\nabla \times \vec{H} = i\omega \varepsilon_0 \vec{E}$  as follows

$$E_x(z) = \begin{cases} \frac{i\kappa_a}{\omega \varepsilon_0 \varepsilon_a} (A+B) e^{-\kappa_a z}, & (z > 0) \\ \frac{k_z^{(2)}}{\omega \varepsilon_0 \varepsilon_t^{(2)}} (A e^{ik_z^{(2)} z} - B e^{-ik_z^{(2)} z}), & (-d_1 < z \leq 0) \\ \frac{k_z^{(3)}}{\omega \varepsilon_0 \varepsilon_t^{(3)}} (C e^{ik_z^{(3)} z} - D e^{-ik_z^{(3)} z}), & (-d_2 < z \leq -d_1) \\ \frac{k_z^{(4)}}{\omega \varepsilon_0 \varepsilon_t^{(4)}} (E e^{ik_z^{(4)} z} - F e^{-ik_z^{(4)} z}), & (-d_3 < z \leq -d_2) \\ \frac{-i\kappa_s}{\omega \varepsilon_0 \varepsilon_s} (E e^{-ik_z^{(4)} d_3} + F e^{ik_z^{(4)} d_3}) e^{\kappa_s (z+d_3)}, & (z \leq -d_3) \end{cases} \quad (S6)$$

To derive the mode dispersion relation, we apply the electromagnetic boundary conditions at each interface, requiring the continuity of the tangential components of the magnetic  $H_y(z)$  and electric  $E_x(z)$  fields. Specifically, the following conditions must be satisfied:

$$\begin{aligned} E_x^{(1)} &= E_x^{(2)}, H_y^{(1)} = H_y^{(2)}, & z_1 &= d_1 \\ E_x^{(2)} &= E_x^{(3)}, H_y^{(2)} = H_y^{(3)}, & z_2 &= -d_1 \\ E_x^{(3)} &= E_x^{(4)}, H_y^{(3)} = H_y^{(4)}, & z_3 &= -d_2 \\ E_x^{(4)} &= E_x^{(5)}, H_y^{(4)} = H_y^{(5)}, & z_4 &= -d_3. \end{aligned} \quad (S7)$$

By substituting Eqs. (S5) and (S6) into Eq. (S7), we obtain six independent equations based on the continuity conditions. Note that the conditions  $H_y^{(1)}(-d_1) = H_y^{(2)}(-d_1)$  and  $H_y^{(4)}(-d_3) = H_y^{(5)}(-d_3)$  are redundant due to their dependence on other boundary relations, and therefore are not included in the final set of equations.

$$\begin{bmatrix} \frac{i\kappa_a}{\varepsilon_a} - \frac{k_z^{(2)}}{\varepsilon_t^{(2)}} & \frac{i\kappa_a}{\varepsilon_a} + \frac{k_z^{(2)}}{\varepsilon_t^{(2)}} & 0 & 0 & 0 & 0 \\ \frac{k_z^{(2)}}{\varepsilon_t^{(2)}} e^{-ik_z^{(2)} d_1} & -\frac{k_z^{(2)}}{\varepsilon_t^{(2)}} e^{ik_z^{(2)} d_1} & -\frac{k_z^{(3)}}{\varepsilon_t^{(3)}} e^{-ik_z^{(3)} d_1} & \frac{k_z^{(3)}}{\varepsilon_t^{(3)}} e^{ik_z^{(3)} d_1} & 0 & 0 \\ e^{-ik_z^{(2)} d_1} & e^{ik_z^{(2)} d_1} & -e^{-ik_z^{(3)} d_1} & -e^{ik_z^{(3)} d_1} & 0 & 0 \\ 0 & 0 & \frac{k_z^{(3)}}{\varepsilon_t^{(3)}} e^{-ik_z^{(3)} d_2} & -\frac{k_z^{(3)}}{\varepsilon_t^{(3)}} e^{ik_z^{(3)} d_2} & -\frac{k_z^{(4)}}{\varepsilon_t^{(4)}} e^{-ik_z^{(4)} d_2} & \frac{k_z^{(4)}}{\varepsilon_t^{(4)}} e^{ik_z^{(4)} d_2} \\ 0 & 0 & e^{-ik_z^{(3)} d_2} & e^{ik_z^{(3)} d_2} & -e^{-ik_z^{(4)} d_2} & -e^{ik_z^{(4)} d_2} \\ 0 & 0 & 0 & 0 & (\frac{i\kappa_s}{\varepsilon_s} + \frac{k_z^{(4)}}{\varepsilon_t^{(4)}}) e^{-ik_z^{(4)} d_3} & (\frac{i\kappa_s}{\varepsilon_s} - \frac{k_z^{(4)}}{\varepsilon_t^{(4)}}) e^{ik_z^{(4)} d_3} \end{bmatrix} \begin{bmatrix} A \\ B \\ C \\ D \\ E \\ F \end{bmatrix} = 0. \quad (S8)$$

To obtain nontrivial solutions for the coefficients  $A, B, C, D, E$ , and  $F$ , the determinant of the coefficient matrix must be zero. This condition yields the dispersion relation of the system. By solving the resulting nonlinear equation, the propagation constant  $\text{ppp}$  can be determined as a function of the propagation angle  $\theta$ .

$$\begin{aligned}
(m_5 + m_6) & \left\{ \begin{aligned} & (m_2 + m_3) \left[ m_1^2 (m_3 + m_4)(m_4 + m_5) + (m_3 - m_4)(m_4 - m_5) \right] + \dots \\ & (m_2 - m_3) \left[ m_1^2 (m_3 - m_4)(m_4 + m_5) + (m_3 + m_4)(m_4 - m_5) \right] m_7^2 \end{aligned} \right\} m_8^2 + \\
(m_5 - m_6) & \left\{ \begin{aligned} & (m_2 + m_3) \left[ m_1^2 (m_3 + m_4)(m_4 - m_5) + (m_3 - m_4)(m_4 + m_5) \right] + \dots \\ & (m_2 - m_3) \left[ m_1^2 (m_3 - m_4)(m_4 - m_5) + (m_3 + m_4)(m_4 + m_5) \right] m_7^2 \end{aligned} \right\} = 0,
\end{aligned} \tag{S9}$$

where  $m_1 = e^{ik_z^{(3)}(d_1-d_2)}$ ,  $m_2 = \frac{i\kappa_a}{\epsilon_a}$ ,  $m_3 = \frac{k_z^{(2)}}{\epsilon_t^{(2)}}$ ,  $m_4 = \frac{k_z^{(3)}}{\epsilon_t^{(3)}}$ ,  $m_5 = \frac{k_z^{(4)}}{\epsilon_t^{(4)}}$ ,  $m_6 = \frac{i\kappa_s}{\epsilon_s}$ ,  $m_7 = e^{ik_z^{(2)}d_1}$ ,  $m_8 = e^{ik_z^{(4)}(d_2-d_3)}$ .

To obtain the analytical solution for the three-layer system corresponding to the hBN ribbon grating without graphene layers, the following nonlinear equation must be solved:

$$(m_2 + m_3)(m_3 + m_6) + (m_2 - m_3)(m_3 - m_6)m_7^2 = 0. \tag{S10}$$

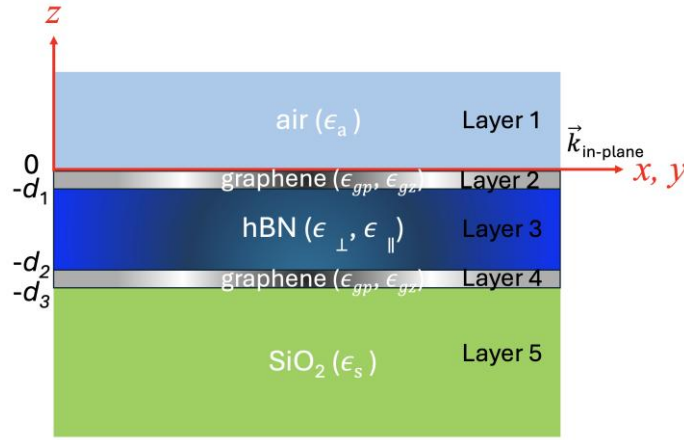

**Figure S2. Five-layer waveguide model for graphene-hBN metasurfaces.** Schematic of the theoretical five-layer slab waveguide model for graphene-covered hBN metasurfaces used in analytical studies. Layers 1–5 correspond respectively to air, graphene, equivalent hBN ribbon layer, graphene, and SiO<sub>2</sub> substrate.

**Supplementary Note 3: Simulated  $\text{Re}(E_z)$  field distributions and corresponding IFCs for hBN gratings modeled with equivalent permittivity derived from the MEMT approach**

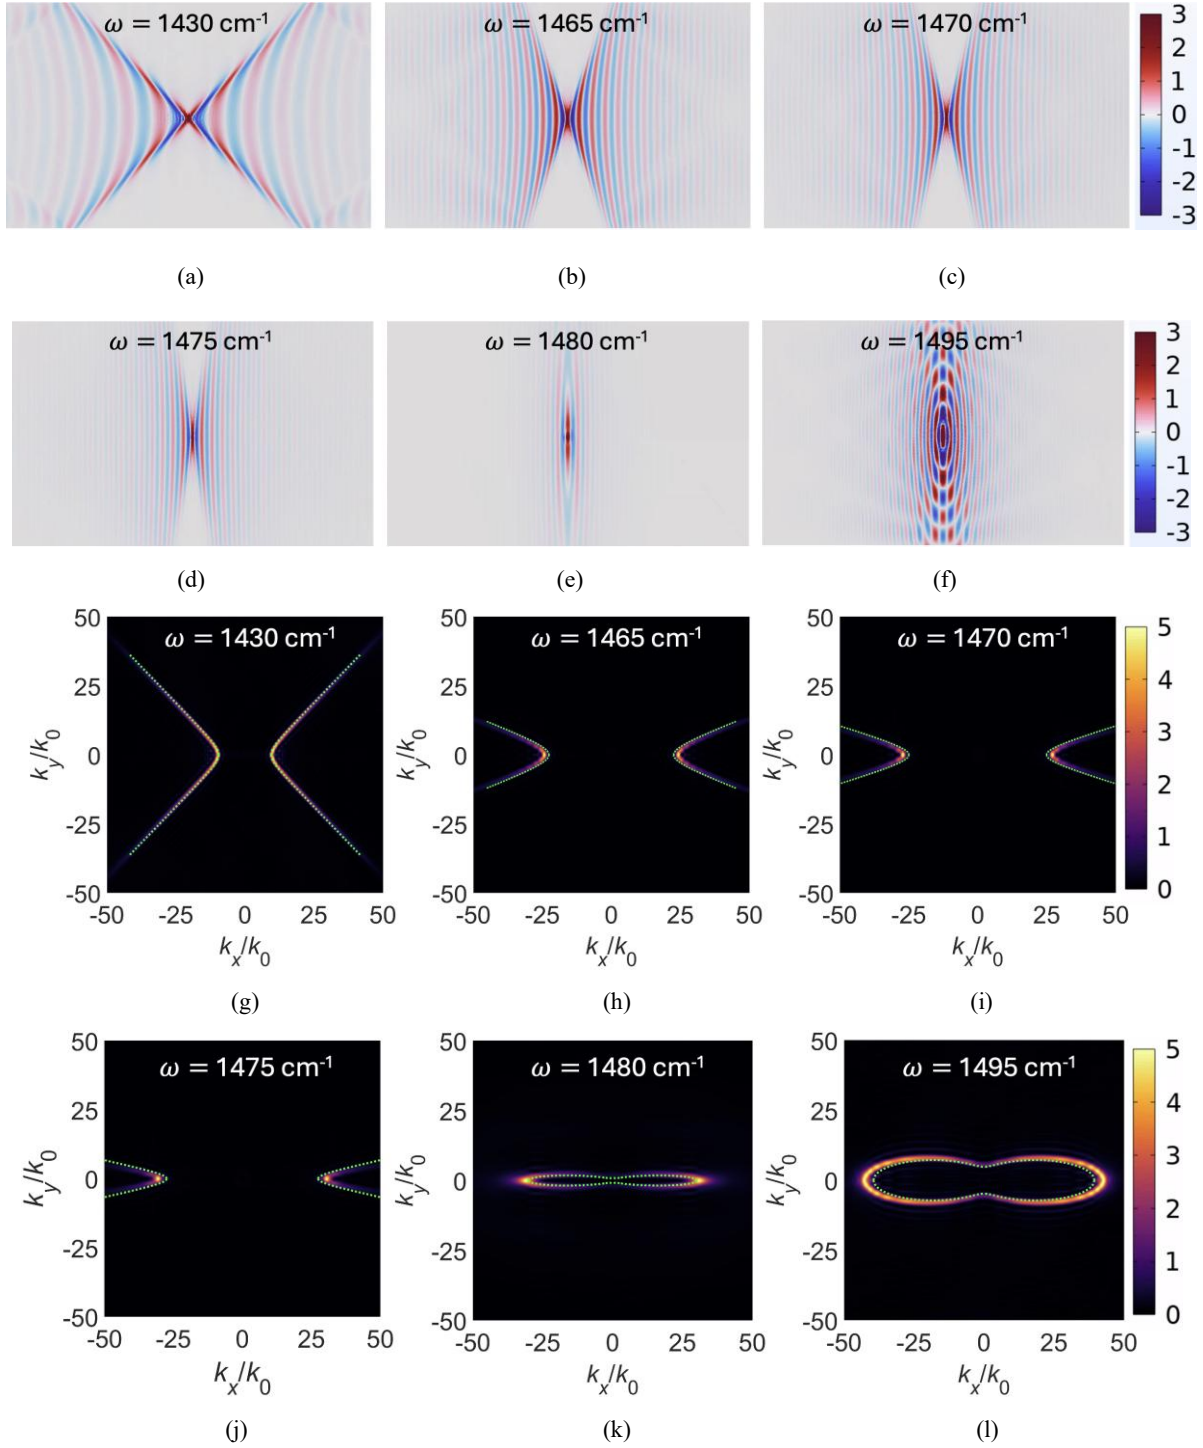

**Figure S3. Numerical validation of bare hBN metasurface dispersion.** Simulated  $\text{Re}(E_z)$  field distributions at frequencies  $\omega$ : (a) 1430, (b) 1465, (c) 1470, (d) 1475, (e) 1480, (f) 1495 cm $^{-1}$  for bare hBN metasurfaces. Corresponding IFCs (g)–(l) were obtained by Fourier transforming  $\text{Re}(E_z)$ . Analytical solutions (green dotted lines) use the three-layer slab model [see Eq. (S10)] for comparison.

**Supplementary Note 4. Simulated  $\text{Re}(E_z)$  field distributions of bare and graphene-sandwiched hBN metasurfaces along their respective canalization directions.**

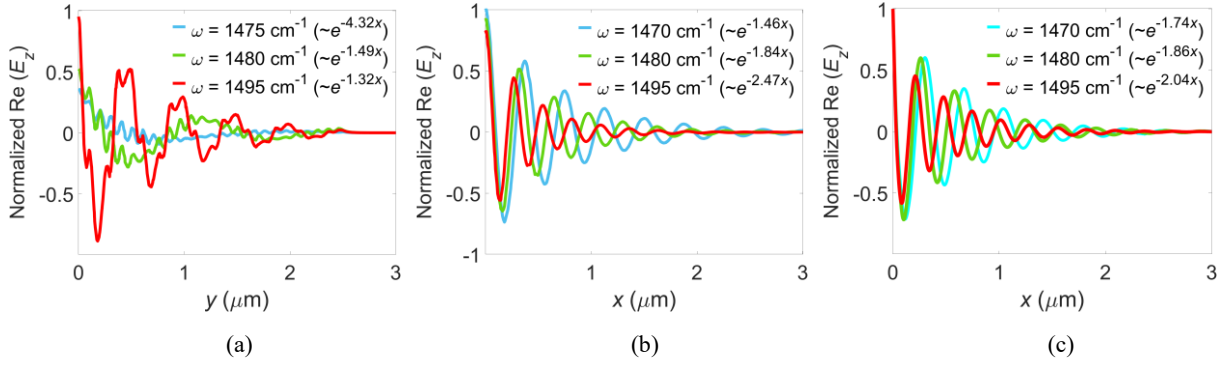

**Figure S4. 1D profiles of  $\text{Re}(E_z)$  with the corresponding decay rates along the canalization directions.**  $\text{Re}(E_z)$  field profiles along the (a)  $y$ -direction of bare hBN metasurface using an ideal dipole source at  $\omega = 1475$ , 1480, and  $1495 \text{ cm}^{-1}$ , (b)  $x$ -direction of graphene-sandwiched hBN metasurface using an ideal dipole source at  $\omega = 1470$ , 1480, and  $1495 \text{ cm}^{-1}$ , and (c)  $x$ -direction of graphene-sandwiched hBN metasurface using an antenna-launched source with antenna tip diameter  $d = 170 \text{ nm}$ , at  $\omega = 1470$ , 1480, and  $1495 \text{ cm}^{-1}$ .

**Supplementary Note 5: Simulated  $\text{Re}(E_z)$  field distributions and IFCs for graphene-sandwiched hBN gratings using equivalent permittivity calculated via the MEMT**

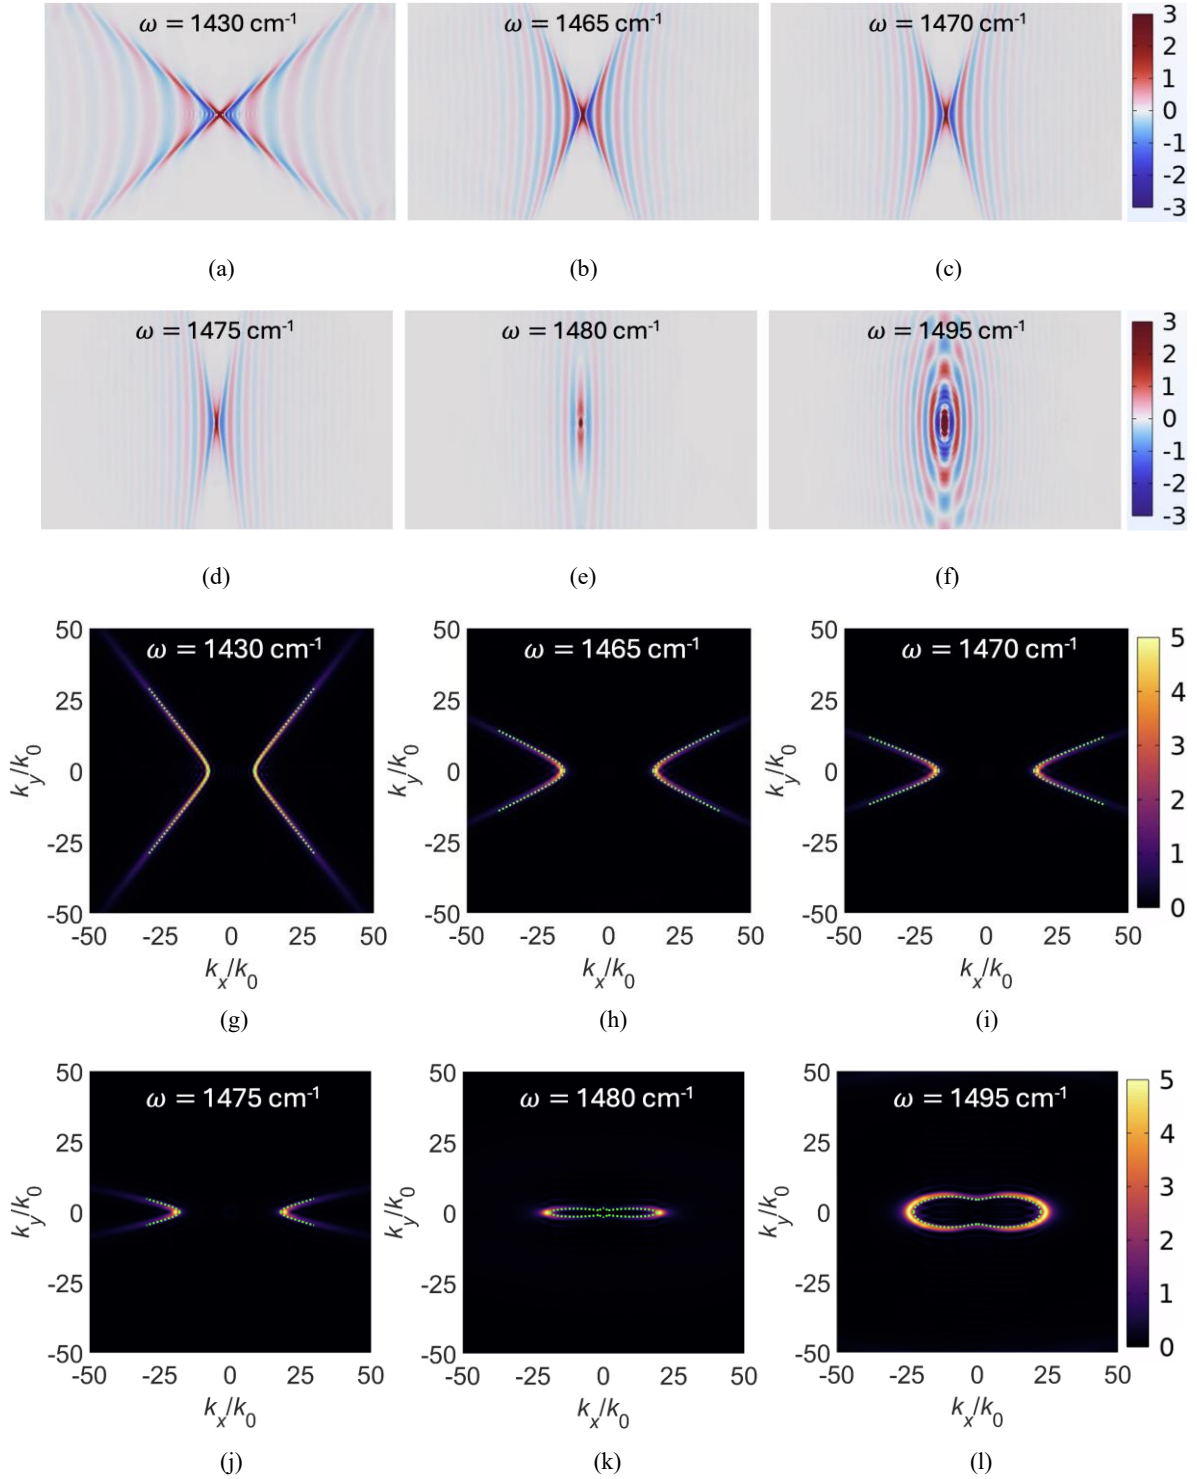

**Figure S5. Numerical validation of graphene-covered hBN metasurface dispersion.** Simulated  $\text{Re}(E_z)$  field distributions at frequencies  $\omega$ : (a) 1430, (b) 1465, (c) 1470, (d) 1475, (e) 1480, (f) 1495  $\text{cm}^{-1}$  for graphene-covered hBN metasurfaces, and the corresponding IFCs (g)–(l) along with analytical solutions (green dotted lines) derived from the five-layer slab model [see Eq. (S9)] under the parameters  $P = 100 \text{ nm}$ ,  $w = 70 \text{ nm}$ ,  $g = 30 \text{ nm}$ ,  $h = 20 \text{ nm}$ , and  $E_f = 0.19 \text{ eV}$ .



**Supplementary Note 6: Simulated  $\text{Re}(E_z)$  field distributions and the corresponding IFCs of graphene-sandwiched hBN metasurface over different thickness of hBN metasurface.**

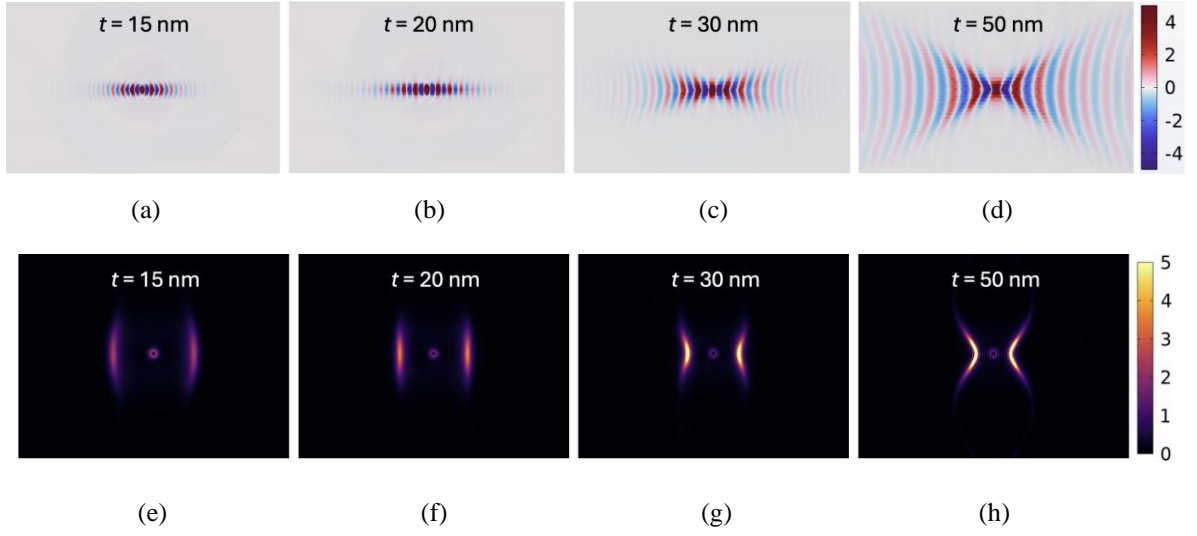

**Figure S6. Influence of hBN ribbon thickness on polariton dispersion.** Thickness-dependent simulated  $\text{Re}(E_z)$  field distributions for varying hBN ribbon thicknesses  $t$ : (a) 15 nm, (b) 20 nm, (c) 30 nm, and (d) 50 nm, with their corresponding IFCs shown in (e)–(h), respectively, at the parameters  $\omega = 1480 \text{ cm}^{-1}$ ,  $P = 100 \text{ nm}$ ,  $w = 70 \text{ nm}$ ,  $g = 30 \text{ nm}$ , and  $E_f = 0.19 \text{ eV}$ .
